1 **Development and Validation of a Machine Learning Wrist-worn Step Detection Algorithm with**

2 **Deployment in the UK Biobank**

3 Scott R. Small<sup>1,2,3</sup>, Shing Chan<sup>1,2</sup>, Rosemary Walmsley<sup>1,2</sup>, Lennart von Fritsch<sup>3</sup>, Aidan Acquah<sup>1,2,4</sup>,

4 Gert Mertes<sup>1,2,4</sup>, Benjamin G. Feakins<sup>1,2</sup>, Andrew Creagh<sup>1,4</sup>, Adam Strange<sup>5</sup>, Charles E. Matthews<sup>6</sup>,

5 David A. Clifton<sup>4</sup>, Andrew J. Price<sup>3</sup>, Sara Khalid<sup>3</sup>, Derrick Bennett<sup>1</sup>, Aiden Doherty<sup>1,2</sup>

6

7 **Affiliations:**

8 <sup>1</sup>Nuffield Department of Population Health, University of Oxford, UK

9 <sup>2</sup>Big Data Institute, Li Ka Shing Centre for Health Information and Discovery, University of Oxford,  
10 UK

11 <sup>3</sup>Nuffield Department of Orthopaedics, Rheumatology and Musculoskeletal Sciences, University  
12 of Oxford, UK

13 <sup>4</sup>Institute of Biomedical Engineering, Department of Engineering Science, University of Oxford

14 <sup>5</sup>SwissRe Institute, UK

15 <sup>6</sup> Division of Cancer Epidemiology and Genetics, National Cancer Institute, Rockville, Maryland,  
16 USA

17

18 **Correspondence to:**

19 Aiden Doherty, PhD

20 Professor of Biomedical Informatics

21 University of Oxford

22 Nuffield Department of Population Health

23 Big Data Institute, Old Road Campus

24 Oxford, UK OX3 7LF

25 Email: [aiden.doherty@ndph.ox.ac.uk](mailto:aiden.doherty@ndph.ox.ac.uk)

26 **Abstract**

27 **Background:** Step count is an intuitive measure of physical activity frequently quantified in a  
28 range of health-related studies; however, accurate quantification of step count can be difficult in  
29 the free-living environment, with step counting error routinely above 20% in both consumer and  
30 research-grade wrist-worn devices. This study aims to describe the development and validation  
31 of step count derived from a wrist-worn accelerometer and to assess its association with  
32 cardiovascular and all-cause mortality in a large prospective cohort study.

33 **Methods:** We developed and externally validated a hybrid step detection model that involves  
34 self-supervised machine learning, trained on a new ground truth annotated, free-living step  
35 count dataset (OxWalk, n=39, aged 19-81) and tested against other open-source step counting  
36 algorithms. This model was applied to ascertain daily step counts from raw wrist-worn  
37 accelerometer data of 75,493 UK Biobank participants without a prior history of cardiovascular  
38 disease (CVD) or cancer. Cox regression was used to obtain hazard ratios and 95% confidence  
39 intervals for the association of daily step count with fatal CVD and all-cause mortality after  
40 adjustment for potential confounders.

41 **Findings:** The novel step algorithm demonstrated a mean absolute percent error of 12.5% in  
42 free-living validation, detecting 98.7% of true steps and substantially outperforming other recent  
43 wrist-worn, open-source algorithms. Our data are indicative of an inverse dose-response  
44 association, where, for example, taking 6,596 to 8,474 steps per day was associated with a 39%  
45 [24-52%] and 27% [16-36%] lower risk of fatal CVD and all-cause mortality, respectively,  
46 compared to those taking fewer steps each day.

47 **Interpretation:** An accurate measure of step count was ascertained using a machine learning  
48 pipeline that demonstrates state-of-the-art accuracy in internal and external validation. The  
49 expected associations with CVD and all-cause mortality indicate excellent face validity. This  
50 algorithm can be used widely for other studies that have utilised wrist-worn accelerometers and  
51 an open-source pipeline is provided to facilitate implementation.

52

53

54

55

56

57

58

59

60

61

62

63

64

65 **Funding Acknowledgements:** This research has been conducted using the UK Biobank Resource  
66 under Application Number 59070. This research was funded in whole or in part by the  
67 Wellcome Trust [223100/Z/21/Z]. For the purpose of open access, the author has applied a CC-  
68 BY public copyright licence to any author accepted manuscript version arising from this  
69 submission. AD and SS are supported by the Wellcome Trust. AD and DM are supported by  
70 Swiss Re, while AS is an employee of Swiss Re. AD, SC, RW, SS, and SK are supported by HDR UK,  
71 an initiative funded by UK Research and Innovation, Department of Health and Social Care  
72 (England) and the devolved administrations. AD, DB, GM, and SC are supported by  
73 NovoNordisk. AD is supported by the BHF Centre of Research Excellence (grant number  
74 RE/18/3/34214). SS is supported by the University of Oxford Clarendon Fund. DB is further  
75 supported by the Medical Research Council (MRC) Population Health Research Unit. DC holds a  
76 personal academic fellowship from EPSRC. AA, AC and DC are supported by GlaxoSmithKline. SK  
77 is supported by Amgen and UCB BioPharma outside of the scope of this work. Computational  
78 aspects of this research were funded from the National Institute for Health Research (NIHR)  
79 Oxford Biomedical Research Centre (BRC) with additional support from Health Data Research  
80 (HDR) UK and the Wellcome Trust Core Award [grant number 203141/Z/16/Z]. The views  
81 expressed are those of the author(s) and not necessarily those of the NHS, the NIHR or the  
82 Department of Health.

83

84

## 85 Introduction

86 Physical activity has been associated with lower risk of a wide range of non-communicable  
87 diseases and is a key feature of public health guidelines for cardiovascular health<sup>1-3</sup>. While  
88 researchers most commonly report device-measured activity in terms of overall acceleration or  
89 time-use behaviours derived from intensity thresholds<sup>4</sup>, the reporting of steps is a more intuitive  
90 measure of physical activity intrinsically linked to the key biomechanical feature of human gait<sup>5</sup>.  
91 However, current methods to measure steps from wrist-worn monitors during free-living activity  
92 are inaccurate<sup>6</sup>.

93 Most activity tracking devices with embedded step counting rely on proprietary step counting  
94 methods without transparent evaluation<sup>7</sup>, and many popular open-source step counting  
95 algorithms were not developed in accordance with, or lack validation against, direct observation  
96 ground truth step counts in a free-living environment<sup>8-10</sup>. Current standards require commercial  
97 activity trackers to estimate step counts with an error of less than 10% in laboratory-controlled  
98 treadmill testing<sup>11</sup>. Subsequently, many devices and algorithms perform well during scripted,  
99 moderately paced walking in controlled conditions<sup>12,13</sup>. However, step counting performance  
100 substantially deteriorates in the real-world environment, wherein mean absolute percent error  
101 (MAPE) is regularly well above 20% in both commercial and research-grade activity monitors  
102 during free living<sup>6</sup>. As a consequence, uncertainty exists around the strength and shape of the  
103 association of daily step count with all-cause mortality and cardiovascular mortality<sup>14,15</sup>, where  
104 recent studies have not used transparent or robustly validated free-living step counting  
105 algorithms.

106 In response, we set out to develop and validate a method to accurately measure steps in free-  
107 living environments. The purpose of this study was threefold: 1) to develop a novel self-  
108 supervised learning step detection algorithm trained with free-living stepping data, 2) to  
109 externally validate the algorithm alongside other open-source algorithms, and 3) to evaluate the  
110 face validity of this method in a large scale prospective cohort study by associating step counts  
111 with fatal CVD and all-cause mortality.

## 112 **Methods**

### 113 *Development of the Free-Living, Ground Truth Annotated OxWalk Dataset*

114 To develop the OxWalk<sup>16</sup> dataset, participants contributed activity data during unscripted, free  
115 living. Participants wore four triaxial accelerometers (AX3, Axivity, Newcastle, UK), two placed  
116 side-by-side on the dominant wrist and two clipped to the dominant-side hip at the midsagittal  
117 plane. Accelerometers were synchronised using the Open Movement GUI software (v.1.0.0.42),  
118 with one recording at 100 Hz and the other at 25 Hz at each body location. Final accelerometer  
119 data was resampled to the nominal sampling rate and calibrated to local gravity using the Open  
120 Movement software package. Foot-facing video was captured using an action camera (Action  
121 Camera CT9500, Crosstour, Shenzhen, China) mounted at the participant's beltline  
122 (Supplemental Figure 1). Participants were instructed to wear the camera for one hour and could  
123 remove the camera any time they felt uncomfortable or required additional privacy<sup>17</sup>. To create  
124 a clear, easily distinguishable data point for video and accelerometer synchronisation in this  
125 study, participants were asked to strike their accelerometers together with four forceful blows  
126 within camera view at the start of data collection<sup>18</sup>.

127 Ground truth annotation of steps was conducted within video annotation software (Elan 6.0, The  
128 Language Archive, Nijmegen, Netherlands) by two independent annotators (SS and LvF) blinded  
129 to each other's results. Similar to Bassett et al., we identified the act of lifting a foot and placing  
130 it in a new location as a central tenant of step identification<sup>5</sup>. This definition was used as the  
131 framework for step annotation in the OxWalk dataset, with an annotated step being a  
132 repositioned foot linked to a change in gross body position along the floor. Annotated steps did  
133 not include foot shuffling, changing of foot alignment via pivoting, or shifting of weight from one  
134 foot to the other. Ethical approval for participant recruitment was obtained from the Central  
135 University Research Ethics Committee of the University of Oxford (Ref: R63137/RE001). Written  
136 informed consent was obtained from adult volunteers (aged 18 and above) with no lower limb  
137 injury within the previous six months and who were able to walk without an assistive device.

138

### 139 *Model Development and Evaluation*

140 To develop the proposed step count model, a hybrid machine learning and peak detection  
141 algorithm was created wherein an activity classification model was first used to detect periods of  
142 walking and non-walking, followed by step counting only on predicted walking data epochs  
143 (Figure 1). Activity classification was performed using a self-supervised deep learning model  
144 developed by Yuan et al<sup>20</sup> incorporating an 18-layer ResNet-V2<sup>21</sup> pre-trained using self-  
145 supervised tasks on the UK Biobank accelerometer dataset. This pre-training step has previously  
146 demonstrated consistent performance improvement for downstream activity recognition tasks  
147 against Random Forest activity classification<sup>20</sup>. The pre-trained self-supervised learning model  
148 was then trained for supervised gait classification using the OxWalk dataset, wherein training

149 data consisted of 10 second epochs of accelerometer data with ground-truth walk or non-walk  
150 labels. In the OxWalk dataset, walking was defined as at least four steps within the 10 second  
151 epoch. Ten-fold cross-validation was used to train and validate the walking activity classifier and  
152 evaluate end-to-end performance of the step detection pipeline. The participant dataset was  
153 divided into 10 equal random folds where one fold was left out for testing and the remaining  
154 folds underwent a randomised 80%-20% split for training and validation, respectively. Folds were  
155 stratified by class label and data was grouped by participant. The self-supervised learning model  
156 was trained on the remaining set with an early-stopping mechanism on the validation set when  
157 the loss stopped decreasing for 5 consecutive training epochs. The weights prior to early stopping  
158 were used to perform activity prediction on the test and validation set. An additional data-  
159 augmentation step was performed during training, whereby each triaxial training sample was  
160 randomly transformed with a rotation along a random axis and the axes were switched in a  
161 random order to make the model rotation invariant. The model was trained using PyTorch 1.12.1  
162 and Adam optimisation<sup>22</sup> with a learning rate of 0.0001. Weighted cross entropy loss was used,  
163 with the class weights set in such a way that the balance of walking and non-walking segments  
164 was 10% to 90%, respectively, bringing the class balance in line with 24-hour direct observation  
165 during free living in a previously collected dataset<sup>23</sup>. Finally, predictions on the validation set and  
166 corresponding ground-truth labels were used to train a Hidden Markov Model smoother which  
167 was then applied to the predictions in the test set.

168 Step counting was performed through peak detection on classified walking time windows using  
169 the “find\_peaks” method from the SciPy Python package<sup>24</sup>. Euclidean norm of triaxial  
170 acceleration, minus 1 g to remove the effect of gravity, was clipped between  $\pm 2$  g and lowpass



171 filtered at 5 Hz prior to use as the input signal for peak detection. The “find\_peaks” method  
172 detects local peaks using predefined heuristics including the minimum peak height (prominence),  
173 maximum peak width (width), and minimum time between peaks (distance). These heuristics  
174 served as detection hyperparameters for which optimal values would minimise the mean  
175 absolute error for step count in the validation set. Detection parameters were iterated across a  
176 pre-selected range of values (prominence: 0.1 to 1 g; distance: 0.2 to 2 s; width: 10 ms to 1 s).  
177 Model performance metrics were calculated on participants within each test set; mean precision,  
178 recall, F1, Cohen’s kappa, and accuracy were used to evaluate walking classification, while MAPE  
179 and mean bias and Spearman’s rank correlation coefficient were calculated against ground truth  
180 step annotations. Following internal model validation, the final activity prediction model was  
181 retrained on the entire OxWalk dataset with an 80%-20% training-validation split prior to external  
182 deployment.

### 183 *External Model Validation*

184 External model performance was assessed by applying the step detection algorithm to wrist-  
185 worn accelerometer data to an open-source, step-annotated dataset from Clemson University<sup>19</sup>.  
186 Within this external dataset, 30 participants contributed a mean of 37 minutes of activity, split  
187 between three distinct sessions of regular walking (two laps around a predefined path),  
188 semiregular walking (locating objects throughout a building), and irregular walking (collecting  
189 and assembling building blocks distributed around a room). Participants were video recorded  
190 throughout scripted activities, allowing timestamp-annotated steps while wearing Shimmer3  
191 inertial measurement units (Shimmer, Dublin, Ireland) recording at 15 Hz. Researchers annotated

192 steps as well as “shifts”, foot movement not necessarily tied to a change in body position, though  
193 these annotated shifts were not included in the current analysis<sup>19</sup>. Prediction error was quantified  
194 by calculating MAPE and mean percent under/overcounting bias for each gait subtype and  
195 overall, at the participant level, across all gait subtypes. Bland-Altman plots were created for  
196 comparison between cumulative ground truth and predicted step counts for each participant.

### 197 *Open-source Step Count Algorithm Assessment*

198 In addition to assessment of the novel algorithm, two additional step counting approaches were  
199 evaluated in this study using both the OxWalk and Clemson datasets: 1) a recently-published  
200 acceleration-threshold algorithm by Ducharme et al.<sup>8</sup>, and 2) the Verisense algorithm, a popular  
201 open-source peak detection algorithm developed from the Clemson dataset<sup>25</sup> and previously  
202 applied to UK Biobank accelerometer data using integration with the GGIR package<sup>26,27</sup>. Further  
203 details for these algorithms are presented in Supplemental Note 1, while details of all datasets  
204 used are presented in Supplemental Table 1.

### 205 *Model Implementation into the UK Biobank*

206 The UK Biobank is a prospectively recruited observational cohort of over 500,000 participants  
207 aged 40–69 at the time of recruitment, from 2006–2010<sup>28</sup>. From 2013–2015, participants were  
208 invited to wear an Axivity AX3 accelerometer on their dominant wrist, recording at 100 Hz, for a  
209 seven-day, 24 hours per day activity measurement window. In the current study, raw  
210 accelerometer data was processed from 103,391 available participants, after which data was  
211 excluded from participants with fewer than 72 hours of wear, those lacking data across the entire  
212 diurnal cycle, with poor device calibration, or with unrealistic average acceleration ( $>100$  mg)<sup>4</sup>.

213 The externally validated hybrid SSL step detection model was applied to raw accelerometer data  
214 from the UK Biobank. Overall daily step count was reported as the median number of steps taken  
215 across the seven-day measurement period. Missing step count data from non-wear was imputed  
216 by averaging step count from the corresponding time of day in all other valid days, similar to the  
217 imputation of vector magnitude acceleration during non-wear in the UK Biobank physical activity  
218 cohort<sup>4</sup>. One-minute peak cadence was calculated as previously described by Saint-Maurice et  
219 al<sup>29</sup>.

## 220 *Statistical Analysis*

221 UK Biobank participants with prevalent cardiovascular disease or cancer as a primary diagnosis,  
222 as identified by International Classification of Diseases (ICD) codes I00–I99 and C00–C97 in their  
223 routine hospital data, were removed from analysis. Spearman’s rank correlation ( $r$ ) was  
224 calculated between step count, peak cadence, overall acceleration, and UK Biobank derived  
225 activity time use activity classification<sup>23</sup>. Daily step count and one minute peak cadence were  
226 stratified across demographic and self-reported health variables as collected by the UK Biobank  
227 at the time of enrolment. Analysis of variance and Tukey Honestly Significant Difference tests  
228 were conducted to compare step count based on self-reported health and usual walking pace.

229 Multivariable adjusted estimates of the effect of quintiles of step count on the relative hazards  
230 of cardiovascular mortality and all-cause mortality were derived using Cox proportional hazards  
231 regression using age as the underlying timescale<sup>30,31</sup>. Date and cause of death was gathered from  
232 the UK Biobank linked death registry. Length of follow-up was calculated from censoring dates  
233 from the data sources or date of death. Further detail is provided in Supplemental Notes 2-3.

234 Step count detection was deployed on the UK Biobank using the University of Oxford Biomedical  
235 Research Computing cluster, while statistical analysis was completed using R (v.4.1.1) on the UK  
236 Biobank Research Analysis Platform. Statistical code is available at  
237 [https://github.com/OxWearables/UKB\\_steps\\_mortality](https://github.com/OxWearables/UKB_steps_mortality).

## 238 **Results**

### 239 *Step Count Validation in the OxWalk Dataset*

240 Accelerometer and ground truth camera data was collected from 39 participants (19 female, 20  
241 male) with a mean age of 38.5 years (range 19.5 to 81.2 years), a mean wear time of 58 minutes,  
242 and a median [interquartile range (IQR)] 863 [312–2,123] steps within the measurement period.  
243 Thirty-three participants were annotated by both annotators, resulting in a corresponding step  
244 count MAPE of 4.0% and interclass correlation coefficient of 1.0 between annotators. Internal  
245 validation of the self-supervised learning model identified bouts of walking with a Cohen’s Kappa  
246 performance of 0.79 (Supplemental Table 3). Overall cross-validation of step detection in the self-  
247 supervised learning model resulted in a 12.5% MAPE, 1.3% underestimation of steps, and  
248 correlation of  $r = 0.98$  against ground truth in the free-living OxWalk dataset. For comparison,  
249 external validation of the step counting of the 100 Hz OxWalk wrist-worn dataset using the  
250 Ducharme acceleration-threshold algorithm<sup>8</sup> resulted in a 69.1% overestimation of steps (231.3  
251 % MAPE,  $r = 0.91$ ) across all participants. External validation of the Verisense algorithm<sup>10,25</sup>,  
252 incorporated into recent UK Biobank papers<sup>14,26</sup>, produced a 63.5% MAPE, 7.2% underestimation  
253 bias, and  $r = 0.85$  against free-living ground truth step counts (Supplemental Table 2). Bland-  
254 Altman plots for model comparisons against ground truth OxWalk step count are presented in

255 Figure 2, demonstrating lower variability and tighter agreement with ground truth using the  
256 novel step detection algorithm in the free-living dataset.

### 257 *Step Count Validation in the Clemson Dataset*

258 Bland-Altman plots for the performance of each prediction method in the overall Clemson  
259 dataset are also presented in Figure 2. This plot again demonstrates reduced variability and bias  
260 against ground truth using the novel model compared to reference algorithms. In external  
261 validation, the threshold model by Ducharme et al.<sup>8</sup> performed well during sessions of regular  
262 gait, but poorly irregular gait, culminating in an overall MAPE of 47.5% and a 46.9%  
263 overestimation of steps at the participant-level, across all gait subtypes. The Verisense algorithm,  
264 for which this dataset serves as an internal validation, demonstrated a 17.6% underestimation of  
265 steps and a 17.3% per-participant MAPE over all gait subtypes, including 16.3% MAPE during  
266 regular walking (Supplemental Table 4). External validation of our novel self-supervised learning  
267 hybrid step algorithm performed best in the Clemson dataset, producing a 16.5% MAPE and  
268 16.6% underestimation across all gait subtypes, including 9.2% MAPE during regular walking. Due  
269 to superior performance in free-living and laboratory-based validation, the SSL step detection  
270 model was selected for analysis of UK Biobank data.

### 271 *Step Counts in the UK Biobank Physical Activity Cohort*

272 Baseline data from 75,493 UK Biobank participants without prevalent CVD or cancer is presented  
273 in Table 1 and Supplemental Figure 2. Peak step cadence demonstrated expected variations by  
274 self-reported usual walking pace (Supplemental Figure 3) and our measurements of steps  
275 demonstrated orthogonality to standard overall acceleration and time-use metrics  
276 (Supplemental Figure 4). Participants that self-reported that their overall health was excellent

277 were more active than all other participants, taking 2,947 more steps [95% CI 2,678–3,215] ( $p <$   
278 0.001) than those reporting that their overall health was poor. Similarly, self-reported brisk  
279 walkers had a peak one-minute cadence 11.2 steps per minute [95% CI 10.6–11.7] ( $p < 0.001$ )  
280 higher than slow walkers. Adjusted mean daily step counts by self-reported health status and by  
281 selected physician-diagnosed chronic conditions are presented in Figure 3.

### 282 *Association of Step Counts with All-Cause and Cardiovascular Mortality*

283 The Cox regression analysis cohort had a median follow-up of 6.9 [IQR 6.3–7.4] years, with 572  
284 events in the CVD mortality analysis and 1,844 events in the all-cause mortality analysis (Figure  
285 4). For CVD mortality, a curvilinear association was observed with a linear association observed  
286 between the first and third fifths of the step count distribution and then a flattening of the  
287 association for the top two fifths of the distribution. For example, a median daily step count of  
288 8,474 to 10,284 steps per day was associated with a 56% [43–66%] lower risk of CVD mortality  
289 compared to participants taking fewer than 6,596 steps per day, whereas taking 12,677 or more  
290 steps was associated with a 56% [43–66%] lower risk on CVD mortality. Similar results were  
291 observed in the analysis of all-cause mortality and median daily step count, with a 39% [30–47%]  
292 and 43% [34–51%] lower risk of all-cause mortality in the middle and most active 20%,  
293 respectively.

### 294 **Discussion**

295 We have developed a new open-source step counting method, informed by self-supervised  
296 machine learning methods that substantially outperforms current wrist-worn step counting  
297 algorithms in the free-living environment. The open data and code released with this manuscript  
298 will provide the global research community access to a more transparent and well-validated

299 method to measure steps in large-scale wrist-worn accelerometer datasets. When applying the  
300 algorithm and resulting step metric in epidemiological analysis, we demonstrated that a higher  
301 daily step count is associated with a lower risk of all-cause and cardiovascular mortality.

302 Our novel approach of using a hybrid step detection model that involves self-supervised machine  
303 learning outperformed existing wrist-worn step counting methods, producing a 12.5% MAPE and  
304 1.3% step underestimation during free living. Wrist-worn step counting is highly popular in both  
305 commercial and research applications, but valid step detection at the wrist can be associated  
306 with high measurement error relative to ground truth. In 2018, Toth et al.<sup>6</sup> assessed wrist-worn  
307 step detection in free-living conditions, finding error rates between 18% and 120% across a range  
308 of methodologies. We found similar performance in current open-source algorithms during free-  
309 living testing, with a mean average percent error ranging from 64% to 231%. Even while analysing  
310 data from a different device and sampling rate, external validation of the novel model in the  
311 Clemson dataset demonstrated a 9.2% error during regular walking in the laboratory-based  
312 setting, below the 10% MAPE threshold required during treadmill-based validation<sup>11</sup>. External  
313 validation of the novel model outperformed both reference algorithms, including the Verisense  
314 algorithm, which was trained and tuned using the Clemson laboratory dataset<sup>10,25</sup>.

315 This study demonstrates a strong inverse curvilinear association between increased step count  
316 and lower risk of fatal CVD and all-cause mortality while highlighting the importance of accurate  
317 step detection algorithms in epidemiological analysis. Our current results parallel those of Paluch  
318 et al.<sup>15</sup>, who demonstrated higher daily step counts are associated with an incrementally lower  
319 risk of all-cause mortality across 15 international longitudinal cohorts nearly exclusively using hip-  
320 mounted devices. Using less accurate step-detection methods, another study has also indicated

321 a curvilinear association between daily steps and CVD mortality<sup>27</sup>. Though the direction of  
322 epidemiological associations may remain broadly similar across step detection algorithms, it is  
323 important that algorithms derive step counts as accurately as possible. Accurate step counting  
324 will be particularly important when translating results into target levels of physical activity in  
325 guidelines compatible with device-measured activity<sup>32</sup>. Reporting of inaccurate step counts may  
326 additionally be demotivating and counterproductive in terms of health metrics and behavioural  
327 change for individuals monitoring their own physical activity<sup>33</sup>.

328 Clear strengths of our study include the development of a step counting algorithm trained in a  
329 large dataset of free-living, wrist-worn accelerometer data with doubly-annotated ground truth  
330 video and demonstrated high accuracy. While this training data consisted of short 1-hour data  
331 collection windows, it is important to note that the current study algorithm is trained on one of  
332 the most complete free-living, open-source datasets to date. Some overestimation of step counts  
333 may occur when applied to multiday protocols due to the lack of extended periods of sedentary  
334 inactivity in the short training data, however; class rebalancing was utilised to minimise this  
335 effect. In the future, it will be important to further assess the robustness of this method across a  
336 variety of populations and against 24-hour free-living, ground truth annotated step count data.

### 337 **Conclusions**

338 We have developed a new, open, and transparent method that markedly improves the ability to  
339 measure steps in large-scale wrist-worn accelerometer datasets. While using this validated step  
340 detection method trained using free-living data, we demonstrate an inverse dose response of  
341 daily step count with all-cause and cardiovascular disease mortality. This reinforces public health



342 messaging of “the more, the better” approaches toward step count guidelines, encouraging any  
343 increase in physical activity, particularly in populations wherein a specific target number of daily  
344 steps may be unrealistic or feel unreachable.

#### 345 **Data Availability**

346 The OxWalk dataset generated in this study is available for download and free for use through  
347 the Oxford University Research Archive ([https://ora.ox.ac.uk/objects/uuid:19d3cb34-e2b3-](https://ora.ox.ac.uk/objects/uuid:19d3cb34-e2b3-4177-91b6-1bad0e0163e7)  
348 [4177-91b6-1bad0e0163e7](https://ora.ox.ac.uk/objects/uuid:19d3cb34-e2b3-4177-91b6-1bad0e0163e7)). An open-source accelerometer processing tool integrating the  
349 hybrid machine learning step detection method derived in this study will be available for use at  
350 <https://github.com/OxWearables/stepcount>.

351

352

353

354

355

356

357

358

359

360

## 361 References

- 362 1 World Health Organization. 2020 WHO guidelines on physical activity and sedentary  
363 behavior. Geneva: World Health Organization, 2020.
- 364 2 Khurshid S, Weng L-C, Nauffal V, *et al.* Wearable accelerometer-derived physical activity  
365 and incident disease. DOI:10.1038/s41746-022-00676-9.
- 366 3 Barker J, Smith Byrne K, Doherty A, *et al.* Physical activity of UK adults with chronic  
367 disease: cross-sectional analysis of accelerometer-measured physical activity in 96 706  
368 UK Biobank participants. *Int J Epidemiol* 2019; published online Feb 5.  
369 DOI:10.1093/ije/dyy294.
- 370 4 Doherty A, Jackson D, Hammerla N, *et al.* Large scale population assessment of physical  
371 activity using wrist worn accelerometers: The UK biobank study. *PLoS One* 2017; **12**: 1–  
372 14.
- 373 5 Bassett DR, Toth LP, LaMunion SR, Crouter SE. Step Counting: A Review of Measurement  
374 Considerations and Health-Related Applications. *Sport. Med.* 2017; **47**: 1303–15.
- 375 6 Toth LP, Park S, Springer CM, FEYERABEND MD, Steeves JA, Bassett DR. Video-Recorded  
376 Validation of Wearable Step Counters under Free-living Conditions. *Med Sci Sports Exerc*  
377 2018; **50**: 1315–22.
- 378 7 Johnston W, Judice PB, García PM, *et al.* Recommendations for determining the validity  
379 of consumer wearable and smartphone step count: Expert statement and checklist of the  
380 INTERLIVE network. *Br J Sports Med* 2020; **0**: 1–14.
- 381 8 Ducharme SW, Lim J, Busa MA, *et al.* A Transparent Method for Step Detection Using an  
382 Acceleration Threshold. *J Meas Phys Behav* 2021; **1**: 1–10.
- 383 9 Femiano R, Werner C, Wilhelm M, Eser P. Validation of open-source step-counting  
384 algorithms for wrist-worn tri-axial accelerometers in cardiovascular patients. *Gait*  
385 *Posture* 2022; **92**: 206–11.
- 386 10 Maylor BD, Edwardson CL, Dempsey PC, *et al.* Stepping towards More Intuitive Physical  
387 Activity Metrics with Wrist-Worn Accelerometry: Validity of an Open-Source Step-Count  
388 Algorithm. *Sensors* 2022, Vol 22, Page 9984 2022; **22**: 9984.
- 389 11 ANSI/CTA-2056. Physical Activity Monitoring for Fitness Wearables: Step Counting.  
390 Consumer Technology Association, 2016  
391 <https://webstore.ansi.org/standards/ansi/cta20562016ansi>.
- 392 12 Feito Y, Bassett DR, Thompson DL, Y F, DR B, DL T. Evaluation of activity monitors in  
393 controlled and free-living environments. *Med Sci Sports Exerc* 2012; **44**: 733–41.
- 394 13 Mora-Gonzalez J, Gould ZR, Moore CC, *et al.* A catalog of validity indices for step  
395 counting wearable technologies during treadmill walking: the CADENCE-adults study. *Int*  
396 *J Behav Nutr Phys Act* 2022 191 2022; **19**: 1–16.
- 397 14 Del Pozo Cruz B, Ahmadi MN, Lee IM, Stamatakis E. Prospective Associations of Daily  
398 Step Counts and Intensity with Cancer and Cardiovascular Disease Incidence and  
399 Mortality and All-Cause Mortality. *JAMA Intern Med* 2022; : 1DUMMY.
- 400 15 Paluch AE, Bajpai S, Bassett DR, *et al.* Daily steps and all-cause mortality: a meta-analysis  
401 of 15 international cohorts. *Lancet Public Heal* 2022; **7**: e219–28.
- 402 16 Small SR, von Fritsch L, Doherty A, Khalid S, Price AJ. OxWalk: Wrist and hip-based activity  
403 tracker dataset for free-living step detection and gait recognition. 2022.

- 404 DOI:10.5287/bodleian:ORQ2abnbR.
- 405 17 Kelly P, Marshall SJ, Badland H, *et al.* An ethical framework for automated, wearable  
406 cameras in health behavior research. *Am J Prev Med* 2013; **44**: 314–9.
- 407 18 Fortune E, Lugade V, Morrow M, Kaufman K. Validity of using tri-axial accelerometers to  
408 measure human movement - Part II: Step counts at a wide range of gait velocities. *Med*  
409 *Eng Phys* 2014; **36**: 659–69.
- 410 19 Mattfeld R, Jesch E, Hoover A. Evaluating pedometer algorithms on semi-regular and  
411 unstructured gaits. *Sensors* 2021; **21**: 13–6.
- 412 20 Yuan H, Chan S, Creagh AP, Tong C, Clifton DA, Doherty A. Self-supervised Learning for  
413 Human Activity Recognition Using 700,000 Person-days of Wearable Data. *arXiv* 2022;  
414 published online June 6. DOI:10.48550/arxiv.2206.02909.
- 415 21 He K, Zhang X, Ren S, Sun J. Identity mappings in deep residual networks. *Lect Notes*  
416 *Comput Sci (including Subser Lect Notes Artif Intell Lect Notes Bioinformatics)* 2016; **9908**  
417 **LNCS**: 630–45.
- 418 22 Kingma DP, Ba JL. Adam: A method for stochastic optimization. In: 3rd International  
419 Conference on Learning Representations, ICLR 2015 - Conference Track Proceedings.  
420 International Conference on Learning Representations, ICLR, 2015.  
421 <https://arxiv.org/abs/1412.6980> (accessed Dec 21, 2022).
- 422 23 Walmsley R, Chan S, Smith-Byrne K, *et al.* Reallocation of time between device-measured  
423 movement behaviours and risk of incident cardiovascular disease. BMJ Publishing Group  
424 Ltd and British Association of Sport and Exercise Medicine, 2021.
- 425 24 Virtanen P, Gommers R, Oliphant TE, *et al.* SciPy 1.0: fundamental algorithms for  
426 scientific computing in Python. *Nat Methods* 2020 173 2020; **17**: 261–72.
- 427 25 Patterson MR. Verisense-Toolbox/Verisense\_step\_algorithm at master ·  
428 ShimmerEngineering/Verisense-Toolbox.  
429 [https://github.com/ShimmerEngineering/Verisense-](https://github.com/ShimmerEngineering/Verisense-Toolbox/tree/master/Verisense_step_algorithm)  
430 [Toolbox/tree/master/Verisense\\_step\\_algorithm](https://github.com/ShimmerEngineering/Verisense-Toolbox/tree/master/Verisense_step_algorithm) (accessed Oct 20, 2022).
- 431 26 Del Pozo Cruz B, Ahmadi M, Naismith SL, Stamatakis E. Association of Daily Step Count  
432 and Intensity with Incident Dementia in 78430 Adults Living in the UK. *JAMA Neurol*  
433 2022. DOI:10.1001/jamaneurol.2022.2672.
- 434 27 Del Pozo Cruz B, Ahmadi MN, Lee ; I-Min, Stamatakis E. Prospective Associations of Daily  
435 Step Counts and Intensity With Cancer and Cardiovascular Disease Incidence and  
436 Mortality and All-Cause Mortality Supplemental content. *JAMA Intern Med* 2022;  
437 published online Sept 12. DOI:10.1001/JAMAINTERNMED.2022.4000.
- 438 28 Sudlow C, Gallacher J, Allen N, *et al.* UK Biobank: An Open Access Resource for  
439 Identifying the Causes of a Wide Range of Complex Diseases of Middle and Old Age. *PLOS*  
440 *Med* 2015; **12**: e1001779.
- 441 29 Saint-Maurice PF, Troiano RP, Bassett DR, *et al.* Association of Daily Step Count and Step  
442 Intensity with Mortality among US Adults. *JAMA - J Am Med Assoc* 2020; **323**: 1151–60.
- 443 30 Cox DR. Regression Models and Life-Tables. *J R Stat Soc Ser B* 2016; **15**: 1–23.
- 444 31 Cologne J, Hsu WL, Abbott RD, *et al.* Proportional hazards regression in epidemiologic  
445 follow-up studies: An intuitive consideration of primary time scale. *Epidemiology* 2012;  
446 **23**: 565–73.
- 447 32 Thompson D, Batterham AM, Peacock OJ, Western MJ, Booso R. Feedback from physical

448 activity monitors is not compatible with current recommendations: A recalibration study.  
449 *Prev Med (Baltim)* 2016; **91**: 389–94.

450 33 Zahrt OH, Evans K, Murnane E, *et al.* Effects of Wearable Fitness Trackers and Activity  
451 Adequacy Mindsets on Affect, Behavior, and Health: Longitudinal Randomized Controlled  
452 Trial. *J Med Internet Res* 2023;25e40529 <https://www.jmir.org/2023/1/e40529> 2023; **25**:  
453 e40529.

454 34 Gu F, Khoshelham K, Shang J, Yu F, Wei Z. Robust and accurate smartphone-based step  
455 counting for indoor localization. *IEEE Sens J* 2017; **17**: 3453–60.

456 35 Lenth R V. emmeans: Estimated Marginal Means, aka Least-Squares Means. 2022.  
457 <https://cran.r-project.org/package=emmeans>.

458 36 Terry M. Therneau, Patricia M. Grambsch. Modeling Survival Data: Extending the Cox  
459 Model. New York: Springer, 2000.

460 37 Easton D, Peto J, AG B. Floating absolute risk: an alternative to relative risk in survival and  
461 case-control analysis avoiding an arbitrary reference group. *Stat Med* 1991; **10**: 1025–35.

462 38 Carstensen B, Plummer M, Laara E, Hills M. Epi: A Package for Statistical Analysis in  
463 Epidemiology. 2022. <https://cran.r-project.org/package=Epi>.  
464  
465  
466  
467  
468  
469  
470  
471

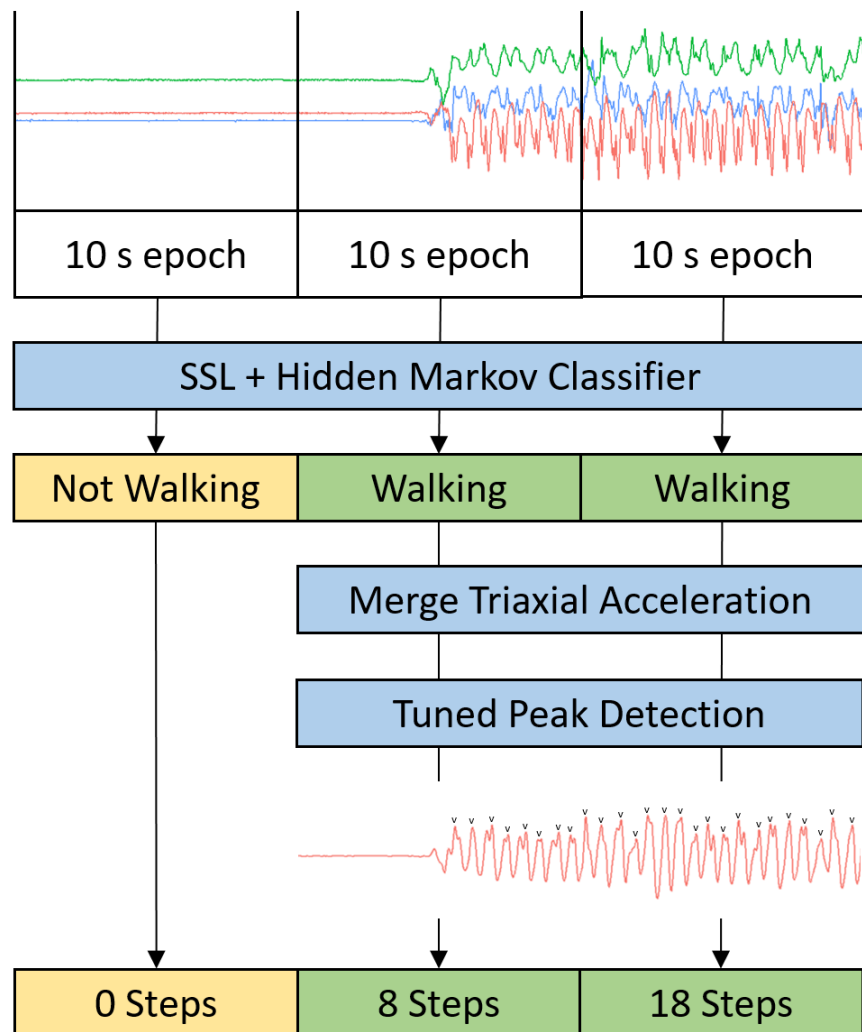

472

473 **Figure 1: Schematic of the process for generating step count from 30 seconds of raw triaxial**  
474 **accelerometer data using a hybrid self-supervised learning (SSL) and peak detection step**  
475 **counting model.**

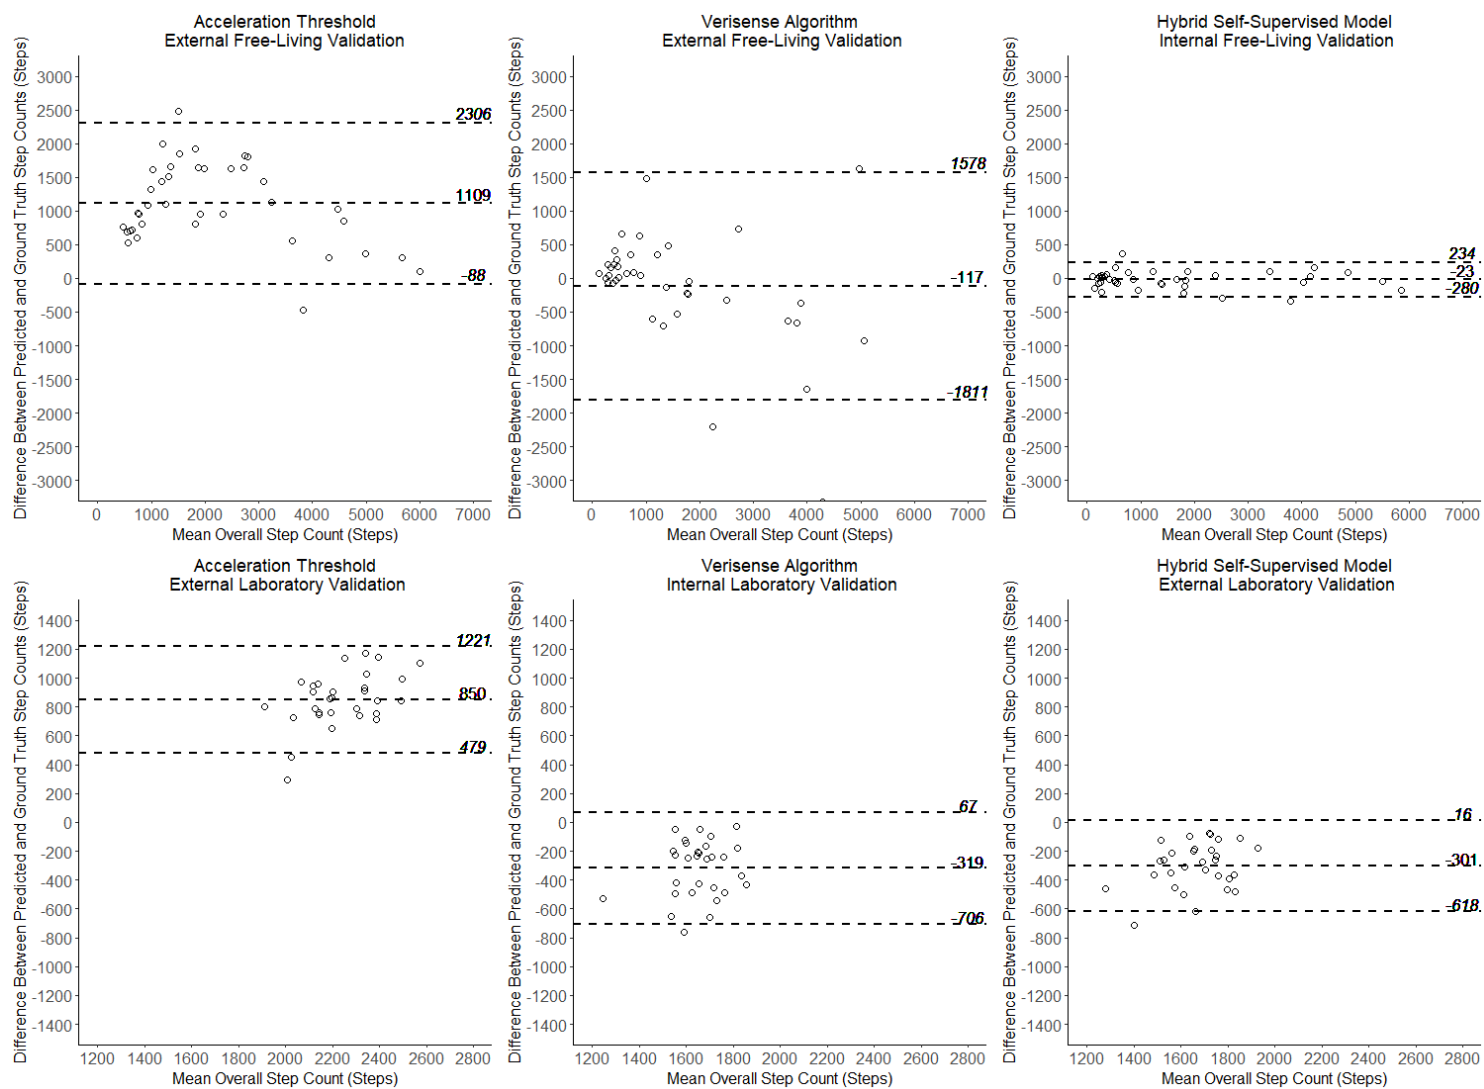

476

477 **Figure 2: Bland-Altman plots with dotted 95% limits of agreement for the comparison of step counting models in the (Top) OxWalk**  
 478 **free-living dataset of 39 adults and (Bottom) Clemson laboratory-based dataset of 30 young adults. Left: baseline acceleration**  
 479 **threshold model<sup>8</sup>, Centre: Verisense algorithm<sup>25</sup>, and Right: the novel hybrid self-supervised learning model.**

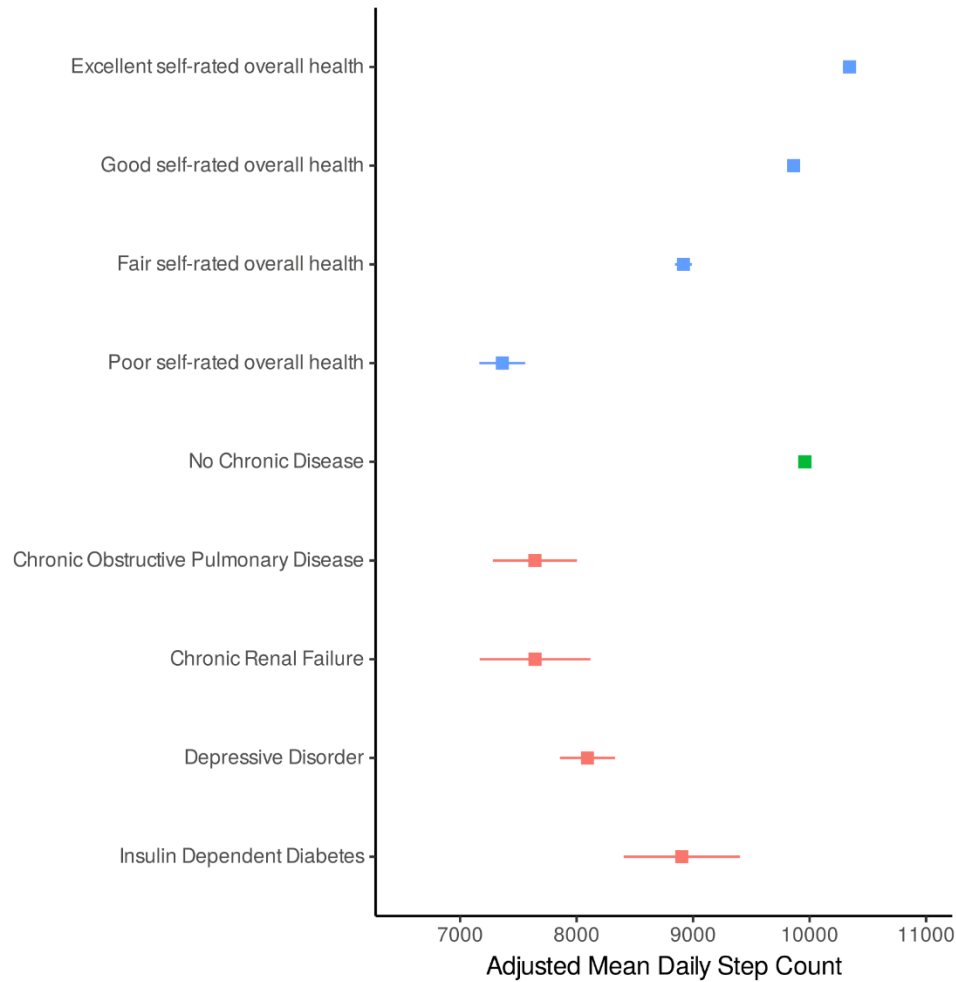

480

481 **Figure 3: Adjusted estimated marginal mean (95% confidence interval) daily step count**  
482 **according to self-reported overall health status, hospital data derived chronic disease status,**  
483 **and select diagnoses for 75,493 UK Biobank participants. Mean daily step counts are adjusted**  
484 **for age and sex.**

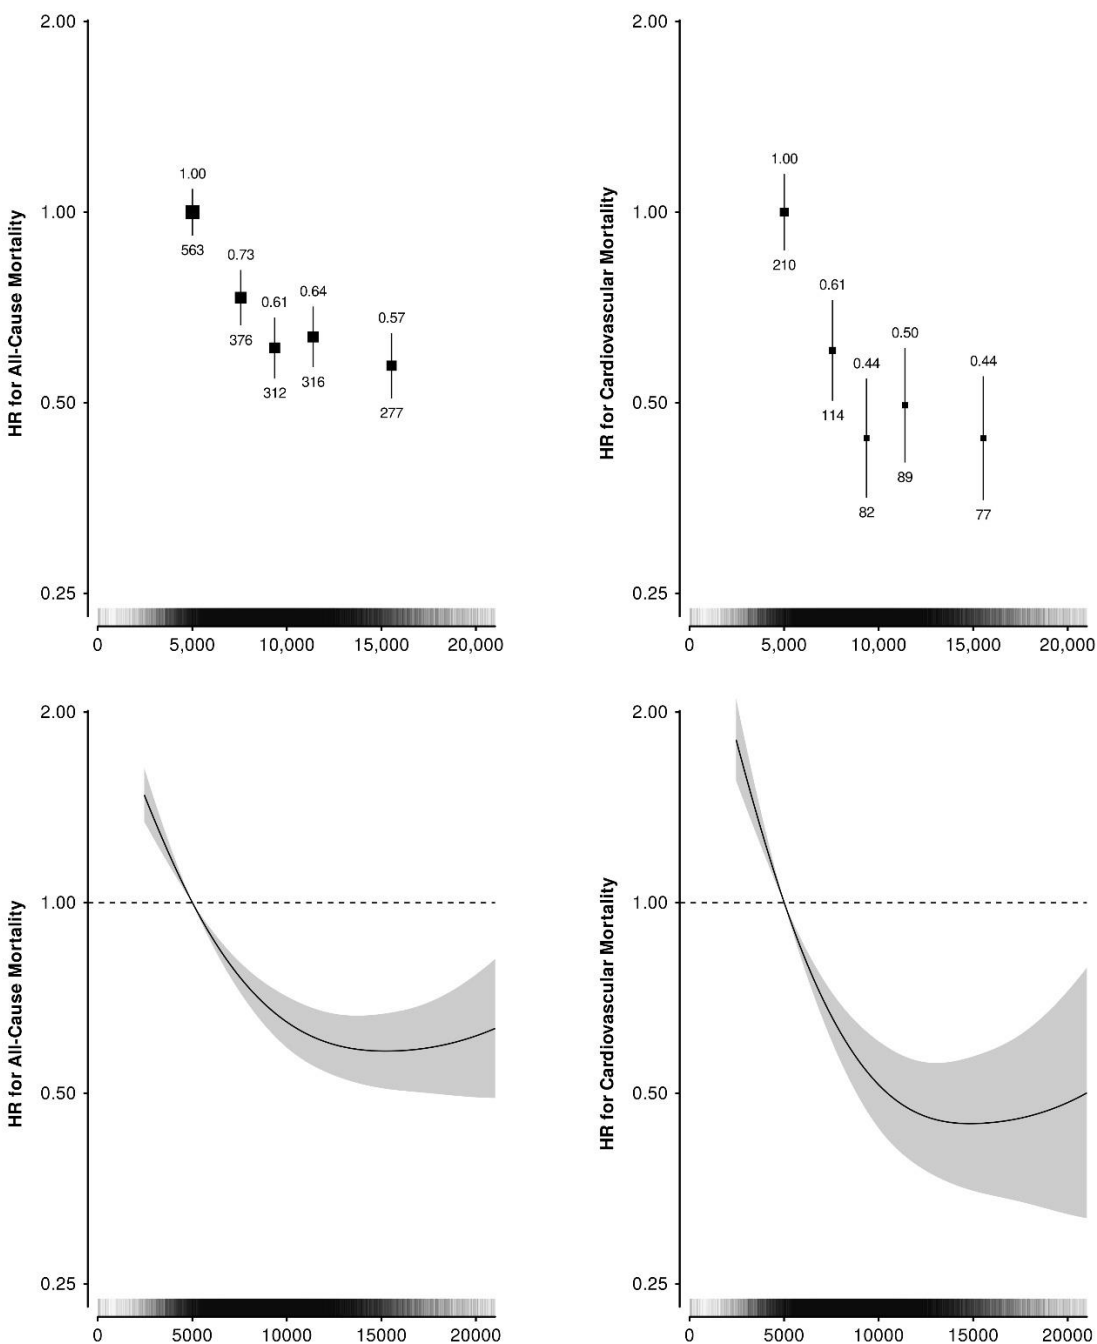

485

486 **Figure 4: (Top) Forest plots for all-cause mortality and cardiovascular disease mortality**  
 487 **associations with quintiles of daily step count, (Bottom) continuous daily step count for**  
 488 **75,493 UK Biobank participants.** Hazard ratios (HR) and 95% confidence intervals were  
 489 calculated using age as a timescale, adjusted for sex, ethnicity, education, alcohol intake,  
 490 smoking status, Townsend deprivation index, processed meat intake, fresh fruit intake, oily fish  
 491 intake, and added salt intake. HR is above and number of events is plotted below each data  
 492 point. Spline plot of hazard ratio and 95% confidence interval of the association of continuously  
 493 modelled median daily step count. Vertical bars along the step axis indicate distribution of  
 494 participant daily step counts.



**Table 1: Overall Physical Activity Metrics by Demographic Characteristic in the UK Biobank**

| Characteristic                               | N (%)          | Daily Steps           | Peak Cadence (Steps per minute) | Overall Acceleration (mg) |
|----------------------------------------------|----------------|-----------------------|---------------------------------|---------------------------|
| Overall                                      | 75,493 (100.0) | 9,352 [7,099-11,973]  | 117 [111-122]                   | 27.5 [22.9-32.9]          |
| <b>Sex</b>                                   |                |                       |                                 |                           |
| Female                                       | 43,802 (58.0)  | 9,267 [7,050-11,840]  | 118 [113-124]                   | 27.8 [23.3-33.2]          |
| Male                                         | 31,691 (42.0)  | 9,468 [7,182-12,159]  | 114 [109-119]                   | 27.0 [22.3-32.6]          |
| <b>Age, years</b>                            |                |                       |                                 |                           |
| 40-49                                        | 7,229 (9.6)    | 9,412 [7,181-12,047]  | 119 [113-125]                   | 30.4 [25.5-36.5]          |
| 50-59                                        | 23,390 (31.0)  | 9,348 [7,136-12,014]  | 118 [113-124]                   | 29.1 [24.4-34.8]          |
| 60-69                                        | 32,903 (43.6)  | 9,497 [7,222-12,122]  | 116 [110-122]                   | 26.9 [22.5-32.1]          |
| 70-79                                        | 11,971 (15.9)  | 8,925 [6,667-11,374]  | 114 [108-120]                   | 24.6 [20.5-29.2]          |
| <b>Ethnicity</b>                             |                |                       |                                 |                           |
| Nonwhite                                     | 2,380 (3.2)    | 9,050 [6,764-11,691]  | 118 [111-124]                   | 28.7 [23.9-34.2]          |
| White                                        | 73,113 (96.8)  | 9,362 [7,115-11,981]  | 116 [111-122]                   | 27.4 [22.9-32.9]          |
| <b>Body Mass Index</b>                       |                |                       |                                 |                           |
| Underweight (<18.5 kg/m <sup>2</sup> )       | 444 (0.6)      | 10,000 [7,972-13,120] | 121 [115-127]                   | 31.3 [25.2-36.8]          |
| Normal weight (18.5-24.9 kg/m <sup>2</sup> ) | 30,312 (40.2)  | 9,923 [7,696-12,526]  | 119 [113-125]                   | 29.5 [24.7-35.1]          |
| Overweight (25.0-29.9 kg/m <sup>2</sup> )    | 30,791 (40.8)  | 9,363 [7,174-11,943]  | 116 [110-121]                   | 27.0 [22.7-32.1]          |
| Obese (30+ kg/m <sup>2</sup> )               | 13,946 (18.5)  | 7,956 [5,896-10,457]  | 113 [107-119]                   | 24.4 [20.3-29.2]          |
| <b>Education</b>                             |                |                       |                                 |                           |
| School Leaver                                | 16,710 (22.1)  | 8,933 [6,749-11,532]  | 116 [110-122]                   | 27.0 [22.3-32.5]          |
| Further Education                            | 25,052 (33.2)  | 9,172 [6,908-11,846]  | 116 [110-122]                   | 27.5 [22.9-32.9]          |
| Higher Education                             | 33,731 (44.7)  | 9,679 [7,454-12,248]  | 117 [112-123]                   | 27.7 [23.2-33.1]          |
| <b>Smoking Status</b>                        |                |                       |                                 |                           |
| Never                                        | 44,231 (58.6)  | 9,422 [7,200-12,007]  | 117 [112-123]                   | 27.8 [23.2-33.2]          |
| Former                                       | 26,107 (34.6)  | 9,329 [7,043-11,984]  | 116 [110-122]                   | 27.3 [22.7-32.7]          |
| Current                                      | 5,155 (6.8)    | 8,784 [6,532-11,547]  | 114 [109-120]                   | 26.3 [21.5-31.8]          |
| <b>Alcohol Consumption</b>                   |                |                       |                                 |                           |
| Never                                        | 4,086 (5.4)    | 8,906 [6,448-11,620]  | 116 [109-122]                   | 26.8 [21.8-32.4]          |
| < 3 Days Per Week                            | 34,319 (45.5)  | 9,031 [6,810-11,622]  | 117 [111-122]                   | 27.3 [22.6-32.7]          |
| 3+ Days Per Week                             | 37,088 (49.1)  | 9,685 [7,475-12,281]  | 117 [111-122]                   | 27.8 [23.3-33.2]          |
| <b>Townsend Deprivation</b>                  |                |                       |                                 |                           |
| Least Deprived (<-3.8)                       | 18,854 (25.0)  | 9,332 [7,200-11,945]  | 116 [110-122]                   | 27.6 [23.1-32.9]          |
| Second Least Deprived (-3.8 to -2.2)         | 18,892 (25.0)  | 9,326 [7,145-11,860]  | 116 [111-122]                   | 27.5 [23.0-32.9]          |
| Second Most Deprived (-2.5 to -1.2)          | 18,869 (25.0)  | 9,362 [7,080-11,951]  | 117 [111-122]                   | 27.5 [22.9-32.9]          |
| Most Deprived (≥-0.2)                        | 18,878 (25.0)  | 9,384 [6,974-12,124]  | 117 [111-124]                   | 27.4 [22.6-32.9]          |

495

| Characteristic                          | N (%)         | Daily Steps          | Peak Cadence (Steps per minute) | Overall Acceleration (mg) |
|-----------------------------------------|---------------|----------------------|---------------------------------|---------------------------|
| <b>Self-Reported Usual Walking Pace</b> |               |                      |                                 |                           |
| Brisk                                   | 36,733 (48.7) | 9,787 [7,567-12,405] | 118 [113-124]                   | 29.0 [24.4-34.6]          |
| Steady                                  | 35,727 (47.3) | 9,078 [6,890-11,653] | 115 [110-121]                   | 26.4 [22.0-31.4]          |
| Slow                                    | 2,905 (3.8)   | 6,889 [4,582-9,495]  | 109 [102-116]                   | 22.3 [18.1-27.2]          |
| None of the above                       | 61 (0.1)      | 5,773 [3,371-10,301] | 107 [99-112]                    | 22.5 [18.4-28.4]          |
| Missing                                 | 67 (0.1)      | 3,148 [868-5,758]    | 96 [65-105]                     | 18.9 [14.1-24.2]          |
| <b>Self-Reported Overall Health</b>     |               |                      |                                 |                           |
| Excellent                               | 17,781 (23.6) | 9,855 [7,708-12,432] | 118 [113-124]                   | 29.2 [24.5-35.0]          |
| Good                                    | 45,755 (60.6) | 9,397 [7,178-12,017] | 116 [111-122]                   | 27.5 [23.0-32.7]          |
| Fair                                    | 10,520 (13.9) | 8,468 [6,208-11,099] | 114 [108-120]                   | 25.3 [20.9-30.4]          |
| Poor                                    | 1,437 (1.9)   | 6,939 [4,394-9,626]  | 110 [103-117]                   | 22.9 [18.4-28.1]          |
| <b>Wear Season</b>                      |               |                      |                                 |                           |
| Spring                                  | 17,327 (23.0) | 9,479 [7,193-12,130] | 117 [111-123]                   | 27.9 [23.2-33.4]          |
| Summer                                  | 20,014 (26.5) | 9,812 [7,525-12,520] | 116 [110-121]                   | 28.1 [23.4-33.6]          |
| Autumn                                  | 22,342 (29.6) | 9,236 [7,040-11,804] | 117 [111-123]                   | 27.4 [22.9-32.8]          |
| Winter                                  | 15,810 (20.9) | 8,774 [6,647-11,288] | 117 [111-123]                   | 26.6 [22.1-31.7]          |

*Activity metrics reported as unadjusted median [interquartile range]*

496

497

498

499

500

501

502

503

504

505

506

507
